# Supplementary material
Source: PubMed Central journal article supplement (PMC2878049)

## SUPPLEMENTARY MATERIAL - FIGURE LEGENDS

Fig. 1. CO at 100  $\mu\text{M}$  does not confer protection against astrocytic apoptosis. Primary cultures of astrocytes cultured in 24 well-plates were pre-treated with 100  $\mu\text{M}$  of CO for 3h, following apoptosis induction by 18h exposure to (A, B) the pro-oxidant, *t*-BHP (from 0 to 280  $\mu\text{M}$ ). The apoptotic hallmarks were assessed by flow cytometry. In (A) the percentage of cells presenting high mitochondrial potential, detected by DiOC<sub>6</sub>(3), is expressed. In (B) the percentage of cells containing intact plasma membrane (viable cells) is presented, assessed with PI fluorochrome. All values are mean  $\pm$  SD, n = 4 (A, B).

Fig. 2. CO confers protection against apoptosis in delayed periods of time. Primary cultures of astrocytes cultured in 24 well-plates were pre-treated with 50  $\mu\text{M}$  of CO for 3h, following apoptosis induction by the pro-oxidant, *t*-BHP (160  $\mu\text{M}$ ) for 48 h. The percentage of viable cells (assessed by PI) is presented at 0, 6, 12, 24 and 48 h after *t*-BHP addition,. All values are mean  $\pm$  SD, n = 3.

Fig. 3. ANT glutathionylation in mitochondria treated with diamide. Isolated non-synaptic mitochondria were pre-treated with CO at 10 or 50  $\mu\text{M}$  or with GSSG at 1  $\mu\text{M}$  for 15 minutes, followed by diamide (100  $\mu\text{M}$ ) incubation at 37°C for 30 minutes; then glutathionylated proteins ( $\alpha$ -GSH) were immunoprecipitated and ANT was immunodetected by Western blot from the immunoprecipitated proteins. This experiment has been repeated three times, with similar results.

**SUPPLEMENTARY MATERIAL - FIGURE**

Figure 1

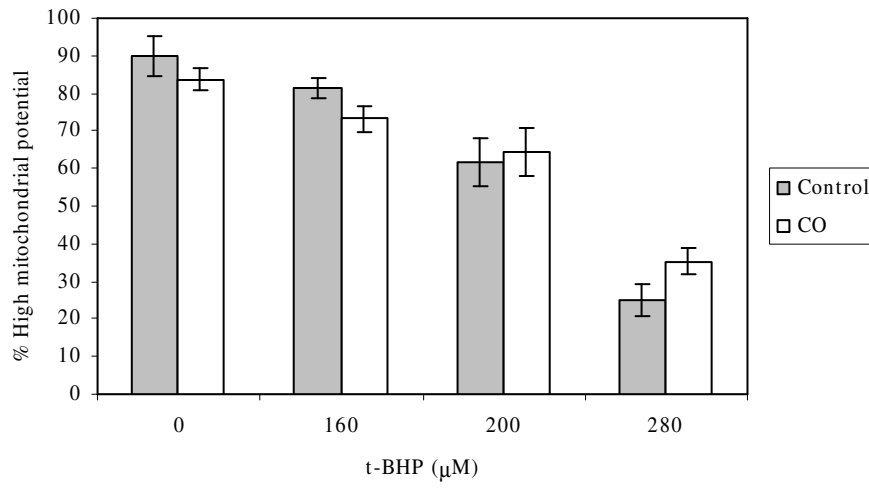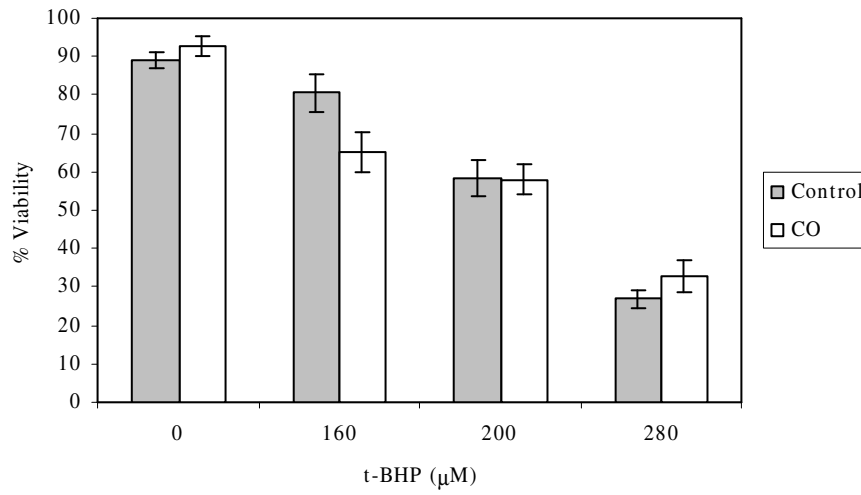

Figure 2

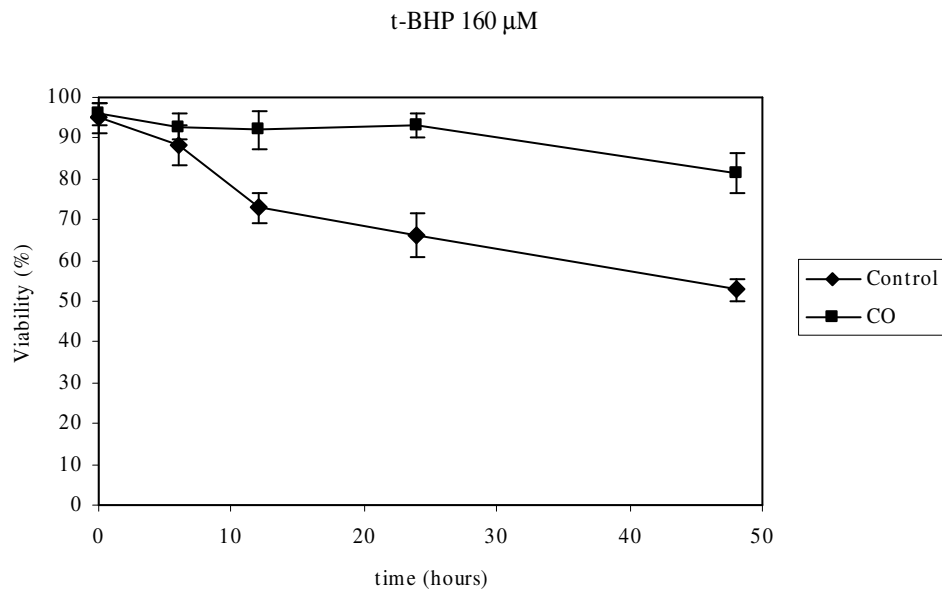

Figure 3

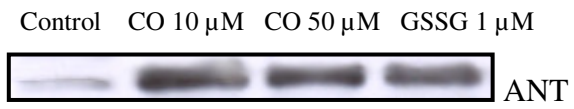

Supplement: supp_M109.065052_jbc.M109.065052-1.pdf [file supp_M109.065052_jbc.M109.065052-1.pdf]
